# Supplementary material for: LC-MS/MS-Based Proteomics Approach for the Identification of Candidate Serum Biomarkers in Patients with Narcolepsy Type 1
Source: MDPI journal article supplement (doi:10.3390/biom13030420), 2023-02-23
Supplement: s1 [file s1]

## **SUPPORTING INFORMATION: LC-MS/MS-based Proteomics Approach for the Identification of Candidate Serum Biomarkers in Patients with Narcolepsy Type 1**

**Akeem Sanni 1 , Mona Goli 1, Jingfu Zhao 1, Junyao Wang 1 , Chloe Barsa 2, Samer El Hayek 3 , Farid Talih 4,**

**Bartolo Lanuzza 5, Firas Kobeissy 2,6 , Giuseppe Plazzi 7,8, Monica Moresco 7, Stefania Mondello 9 ,**

**Raffaele Ferri 5 and Yehia Mechref 1,\***

1 Chemistry and Biochemistry Department, Texas Tech University, Lubbock, TX 79409-1061, USA

2 Faculty of Biochemistry and Molecular Genetics, American University of Beirut, Beirut 1107 2020, Lebanon

3 Department of Psychiatry and Behavioral Sciences, University of Miami Miller School of Medicine, Miami, FL 33124, USA

4 Department of Psychiatry, Faculty of Medicine, American University of Beirut, Beirut 1107 2020, Lebanon

5 Sleep Research Centre, Department of Neurology IC, Oasi Research Institute-IRCCS, 94018 Troina, Italy

6 Multiomics & Biomarkers, Department of Neurobiology, Center for Neurotrauma, Morehouse School of Medicine (MSM), Atlanta, GA 30310, USA

7 IRCCS, Istituto delle Scienze Neurologiche di Bologna, 40139 Bologna, Italy

8 Department of Biomedical, Metabolic and Neural Sciences, University of Modena and Reggio Emilia, 41125 Modena, Italy

9 Department of Biomedical and Dental Sciences and Morphofunctional Imaging, University of Messina, 98122 Messina, Italy

\* Correspondence: yehia.mechref@ttu.edu; Tel.: +1-806-834-8246

**Supporting Information Table S1:** A table summarizing the represented in the Venn diagram that compares the DEPs discovered upon the comparison of all identified proteins based on age, gender, and sample source.

| Names                                                    | Total | Elements                                                                                                                                                                                            |
|----------------------------------------------------------|-------|-----------------------------------------------------------------------------------------------------------------------------------------------------------------------------------------------------|
| Male NT1 <i>vs.</i> Female NT1<br>(Gender)               | 3     | A1BG, FHR5, C1RL                                                                                                                                                                                    |
| Above age 50 NT1 <i>vs.</i> Below<br>age 50 NT1 (Age)    | 4     | C5, PROS, ITIH1, ALS                                                                                                                                                                                |
| Gender <i>vs.</i> Age                                    | 1     | A2GL                                                                                                                                                                                                |
| NT1 <i>vs.</i> CTRL<br>(Not overlapped)                  | 29    | C1S, C1R, VASN, APOH, MASP1, ITIH2,<br>PCYOX, CPB2, CFHR1, CFB, F10, ITIH4,<br>COL6A3, MAN1A1, NRP1, NID1, F12,<br>AMBP, FCN2, AZGP1, SELL, IGFBP3,<br>SERPINA6,<br><br>GC, CP, CRISP3, F2, FN1, C2 |
| Male <i>vs.</i> Female<br>(Not overlapped)               | 7     | PZP, ADIPOQ, PTPRJ, SHBG, CD14,<br>FBLN3, C6                                                                                                                                                        |
| Above age 50 <i>vs.</i> Below age<br>50 (Not overlapped) | 10    | ITIH3, AHSG, PTGDS, SPRC, PLF4, C4A,<br>APOF, IGF1, C9, SERPINA4                                                                                                                                    |

**Supporting Information Table S2:** List of proteins of peptides validated by LC-PRM-MS including  $z$ ,  $m/z$ , RT, FC before validation and FC after validation by PRM. Q14624, P01031, and P02751 are the quantitatively validated proteins when Mann-Whitney  $U$ -test was applied. Their  $p$ -values are 0.03, 0.24, and 0.01 respectively.

| Protein Accession | Gene name    | Annotated sequence                              | $z$      | $m/z$           | RT          | FC          | FC (PRM)    |
|-------------------|--------------|-------------------------------------------------|----------|-----------------|-------------|-------------|-------------|
| <b>Q14624</b>     | <b>ITIH4</b> | <b>DQFNLIVFSTEATQW</b><br><b>RPSLVPASAENVNK</b> | <b>3</b> | <b>1087.891</b> | <b>98.3</b> | <b>0.55</b> | <b>0.89</b> |
| P00450            | CP           | GPEEEHLGILGPVIWA<br>EVGDTIR                     | 2        | 1244.148        | 98.0        | 0.59        | 0.82        |
| P00751            | CFB          | RDLEIEVVLFFHPNYNI<br>NGK                        | 3        | 757.404         | 78.3        | 0.63        | 0.83        |
| <b>P01031</b>     | <b>C5</b>    | <b>LLVYYIVTGEQTAELV</b><br><b>SDSVWLNIEEK</b>   | <b>2</b> | <b>1556.313</b> | <b>32.5</b> | <b>0.24</b> | <b>0.87</b> |
| <b>P02751</b>     | <b>FN1</b>   | <b>DTLTSRPAQGVVTTL</b><br><b>ENVSPPR</b>        | <b>3</b> | <b>780.084</b>  | <b>61.1</b> | <b>3.66</b> | <b>1.61</b> |
| P19823            | ITIH2        | AGELEVFNQYFVHFFA<br>PDNLDPIPK                   | 3        | 946.137         | 103.5       | 0.72        | 0.88        |
| P00450            | CP           | ALYLQYTDETFR                                    | 2        | 760.377         | 62.5        | 0.65        | 0.82        |
| P02751            | FN1          | DDKESVPISDTIIPAVPP<br>PTDLR                     | 3        | 825.771         | 73.7        | 2.54        | 1.61        |
| P06681            | C2           | KNQGILEFYGDIAL<br>K                             | 3        | 646.351         | 89.6        | 0.49        | 0.81        |

**Supporting Information Table S3:** High-level GO analysis of the three quantitatively validated proteins. Their specific functions and the genes involved.

| Number of proteins involved | High-level GO category                                   | Genes          |
|-----------------------------|----------------------------------------------------------|----------------|
| 3                           | Response to stress                                       | ITIH4, C5, FN1 |
| 3                           | Regulation of molecular function                         | ITIH4, C5, FN1 |
| 2                           | Immune system process                                    | C5, FN1        |
| 2                           | Locomotion                                               | C5, FN1        |
| 2                           | Anatomical structure morphogenesis                       | C5, FN1        |
| 2                           | Regulation of localization                               | C5, FN1        |
| 2                           | Regulation of locomotion                                 | C5, FN1        |
| 2                           | Regulation of locomotion                                 | C5, FN1        |
|                             | Biological process involved in interspecies interaction  |                |
| 2                           | between organisms                                        | C5, FN1        |
|                             | Regulation of response to stimulus                       |                |
| 2                           |                                                          | C5, FN1        |
|                             | Anatomical structure formation involved in morphogenesis |                |
| 2                           |                                                          | C5, FN1        |
| 2                           | Cell motility                                            | C5, FN1        |
|                             | Regulation of developmental process                      |                |
| 2                           |                                                          | C5, FN1        |
| 2                           | Leukocyte migration                                      | C5, FN1        |
|                             | Regulation of multicellular organismal process           |                |
| 2                           |                                                          | C5, FN1        |
| 2                           | Cellular localization                                    | ITIH4, FN1     |
| 2                           | Localization of cell                                     | C5, FN1        |
| 1                           | Biological adhesion                                      | FN1            |
| 1                           | Growth                                                   | FN1            |
| 1                           | Immune effector process                                  | C5             |
|                             | Activation of immune response                            |                |
| 1                           |                                                          | C5             |
|                             | Regulation of immune system process                      |                |
| 1                           |                                                          | C5             |
| 1                           | Immune response                                          | C5             |
| 1                           | Cell adhesion                                            | FN1            |
| 1                           | Cell population proliferation                            | FN1            |
| 1                           | Response to external stimulus                            | C5             |
| 1                           | Response to biotic stimulus                              | C5             |
| 1                           | Cell growth                                              | FN1            |
| 1                           | Cytolysis                                                | C5             |
| 1                           | Regulation of signaling                                  | FN1            |
| 1                           | Regulation of cell adhesion                              | FN1            |
| 1                           | Regulation of growth                                     | FN1            |
| 1                           | Taxis                                                    | C5             |

|   |                               |     |
|---|-------------------------------|-----|
| 1 | Cellular component biogenesis | FN1 |
| 1 | Developmental growth          | FN1 |
| 1 | Response to other organisms   | C5  |
| 1 | Protein activation cascade    | FN1 |

Supporting Information Figure 1

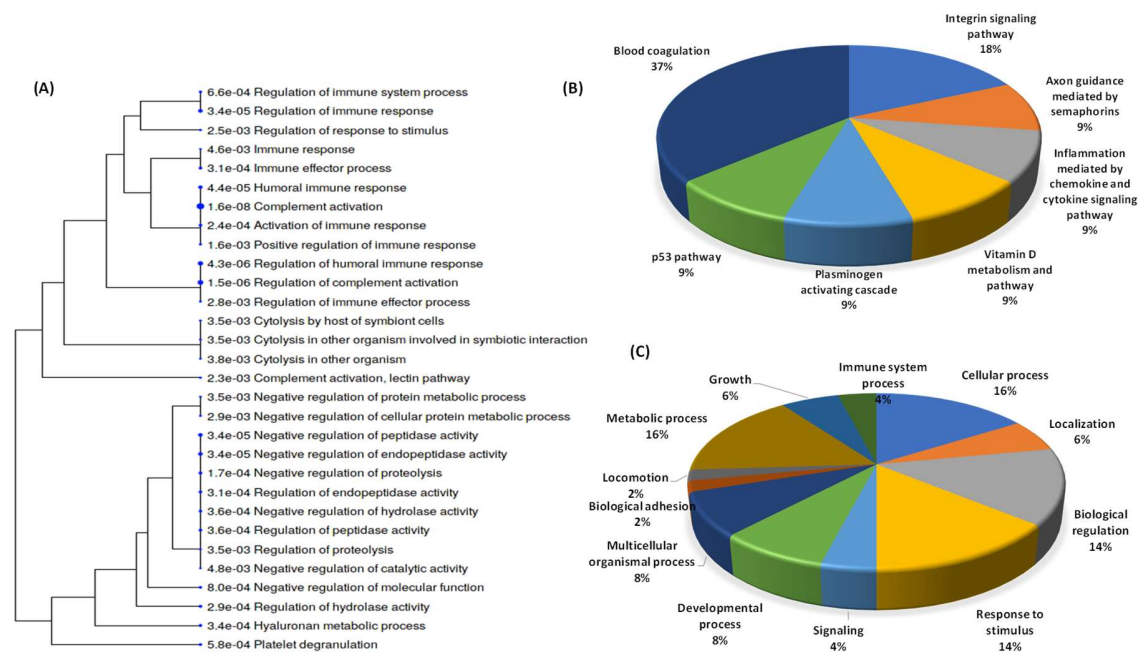

**Supporting Information Figure S1:** (A) Hierarchical clustering of the biological significance of pre-validated DEPs and summary of the relationship between the top 30 pathways that the DEPs alter. Bigger dots indicate more significant *p*-values. GO of all DEPs with respect to (B) molecular functions and (C) biological functions.

## Supporting Information Figure 2

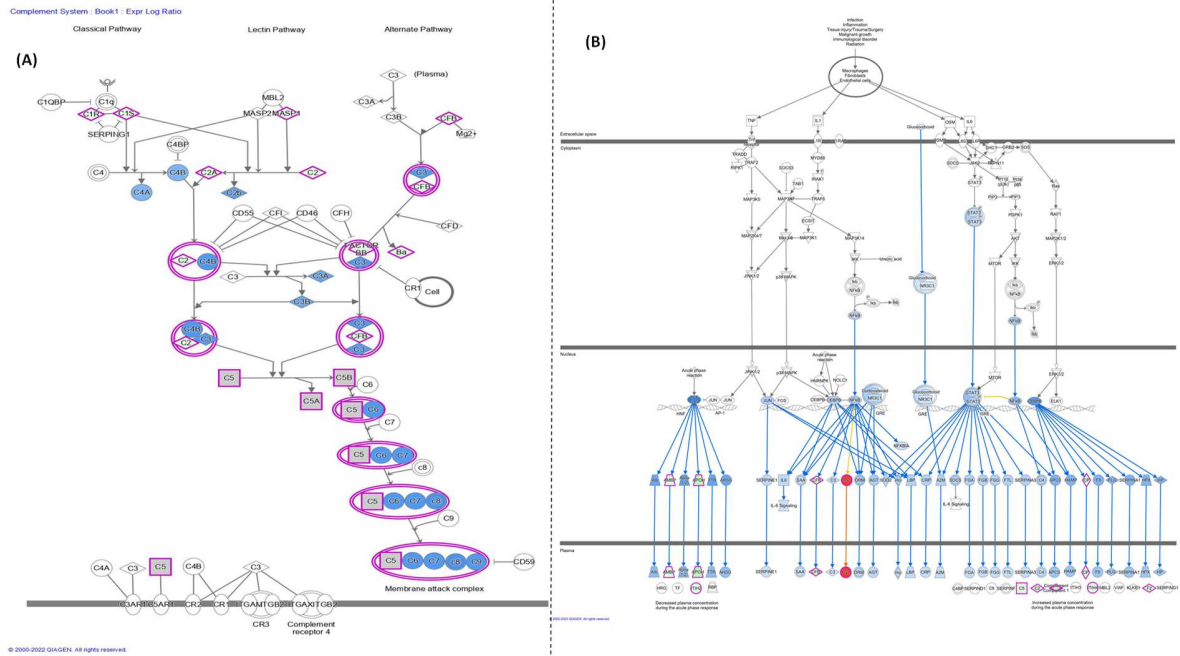

**Supporting Information Figure S2:** Ingenuity Pathway Analysis of the two major pathways associated with DEPs in NT1. (A) Complement Activation Pathway (B) Acute Phase Response Signaling Pathway. The red color denotes the upregulation of proteins, and the green color indicates the downregulation of proteins, in NT1 when compared to the Control. Proteins enclosed in a square and a rhombus shape are among the DEPs.

## Supporting Information Figure S3

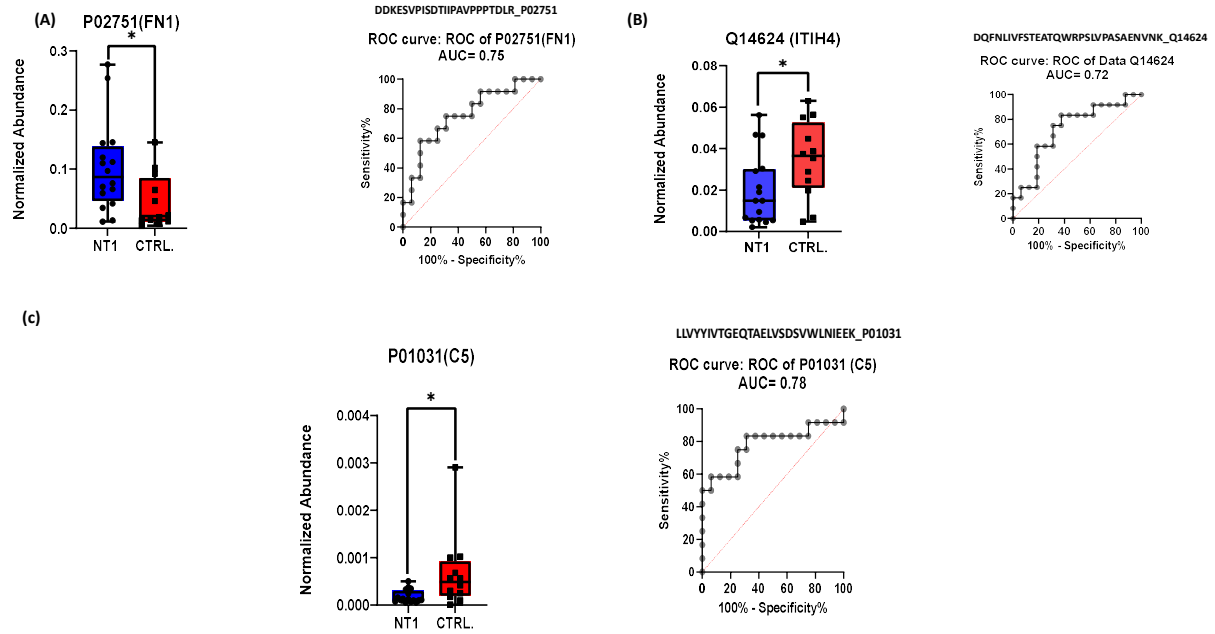

**Supporting Information Figure S3:** Boxplot and ROC curve of the quantitatively validated DEPs coded by genes (A) FN1 (C) C5 (C) ITIH4. After Mann-Whitney *U*-test, Nonsignificant (ns)=  $p > 0.05$ ; \*=  $p < 0.05$ ; \*\*= $p < 0.01$ ; \*\*\*  $p < 0.001$



Supporting Information Figure S4

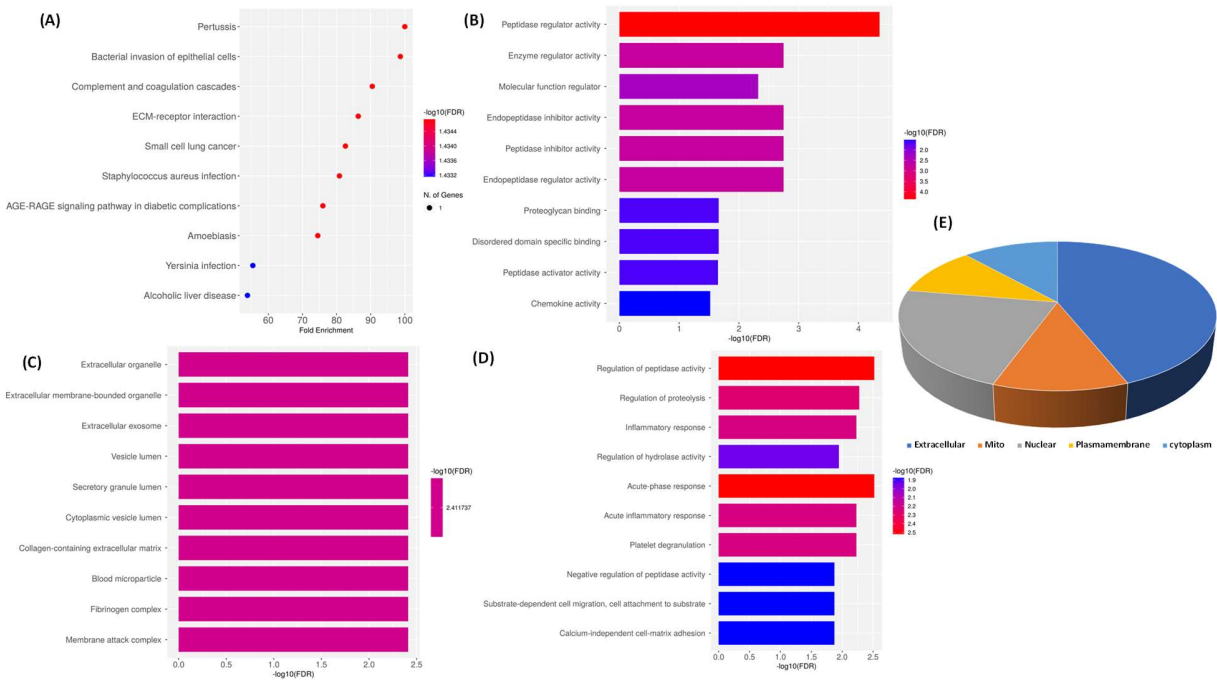

**Supporting Information Figure S4:** KEGG analysis of the three quantitatively validated DEPs based on reactome pathway annotation (A) Functional and fold enrichment analysis. High-level gene ontology for (B) Molecular function, and (C) Cellular function, and (D) biological function. (E) Subcellular distribution of the three quantitatively validated DEPs. In all, only top 10 pathways are considered.

## Supporting Information Figure S5

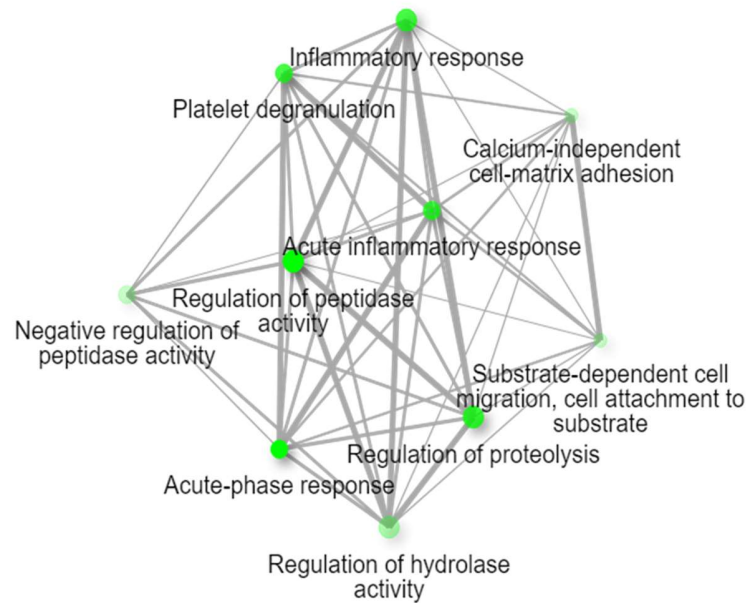

**Supporting Information Figure S5:** Interconnection of the top 10 biological pathways affected by the three quantitatively validated DEPs generated by Shiny GO v7.5. The green dots are the major connection points, and their color intensities indicate the level of the effect of the three proteins on the processes.
